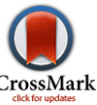

## Correction

# Correction: Bayesian Genome Assembly and Assessment by Markov Chain Monte Carlo Sampling

The *PLOS ONE* Staff

## Notice of Republication

This article was republished on July 11th, 2014, due to Figure 4 and Figure 5 being ordered incorrectly. Please download the PDF again to view the corrected article. The originally published, uncorrected article and the republished, corrected article are provided here for reference.

## Supporting Information

**File S1.** Originally published, uncorrected article.  
(pdf)

**File S2.** Republished, corrected article.  
(pdf)

## Reference

1. Howison M, Zapata F, Edwards EJ, Dunn CW (2014) Bayesian Genome Assembly and Assessment by Markov Chain Monte Carlo Sampling. *PLoS ONE* 9(6): e99497. doi:10.1371/journal.pone.0099497

---

**Citation:** The *PLOS ONE* Staff (2014) Correction: Bayesian Genome Assembly and Assessment by Markov Chain Monte Carlo Sampling. *PLoS ONE* 9(7): e104331. doi:10.1371/journal.pone.0104331

**Published:** July 28, 2014

**Copyright:** © 2014 The *PLOS ONE* Staff. This is an open-access article distributed under the terms of the Creative Commons Attribution License, which permits unrestricted use, distribution, and reproduction in any medium, provided the original author and source are credited.
